# Supplementary material for: A first principles study of the spin–orbit coupling effect in LiM (M = Na, K, Rb, Cs) molecules
Source: Royal Society of Chemistry journal article supplement (doi:10.1039/c9cp06421d), 2020-01-01
Supplement: c9cp06421d1.zip [file c9cp06421d1.zip]

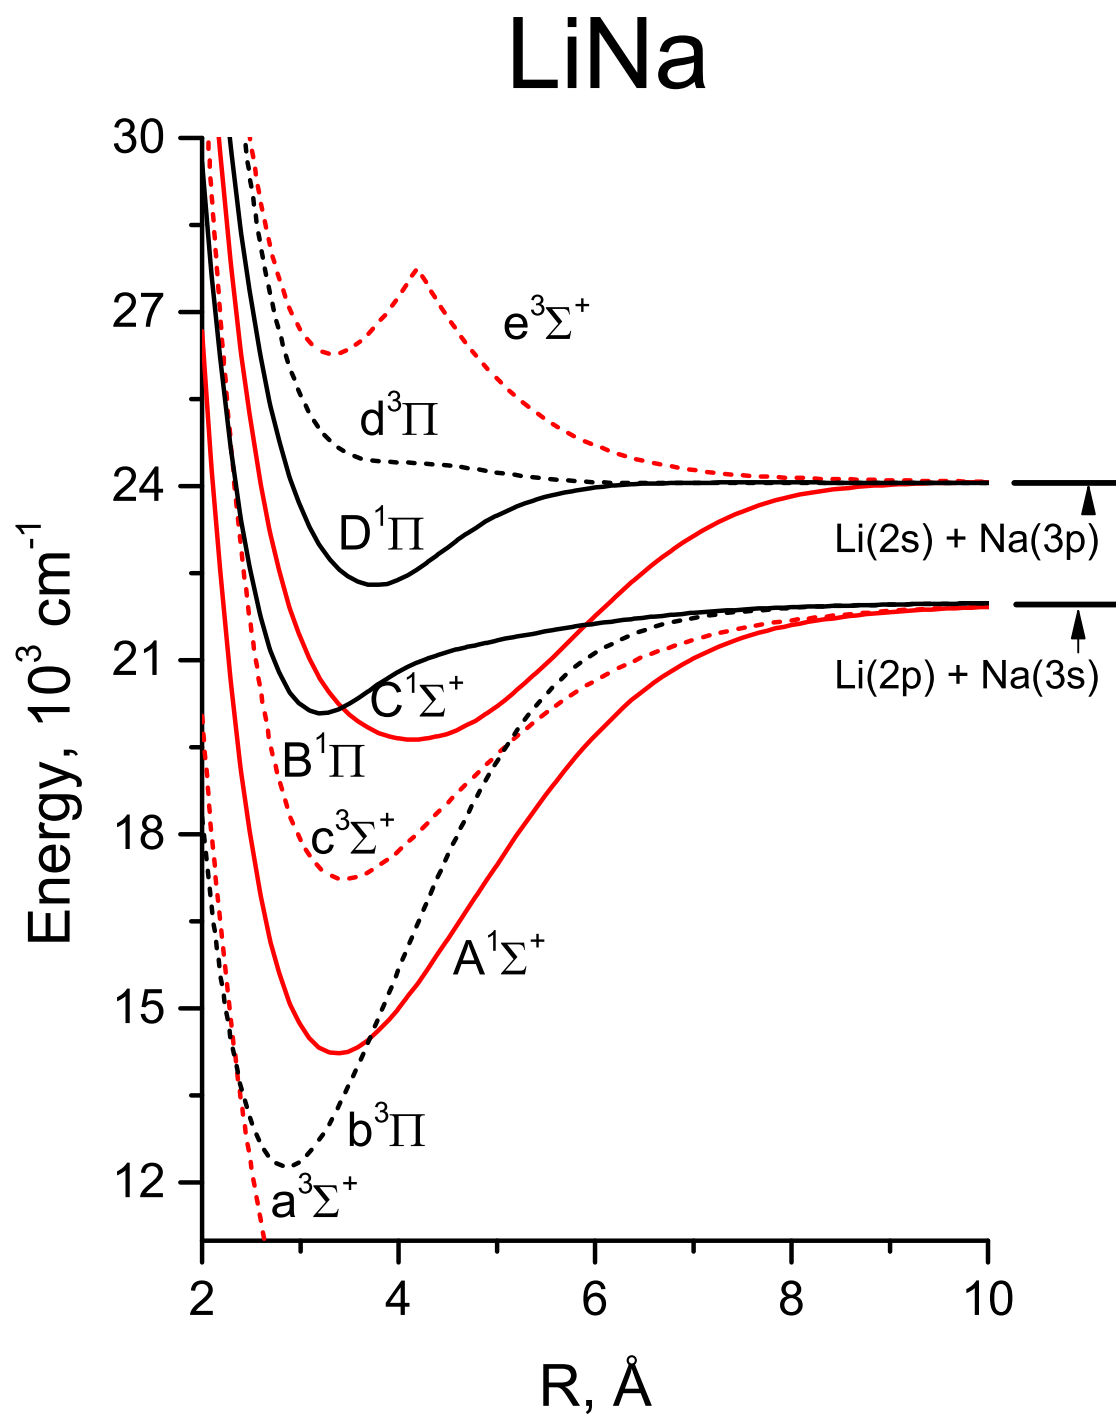

Figure 1: The scheme of the scalar-relativistic CI-CPP energies of LiNa.

# LiNa ( $0^+, 0^-$ )

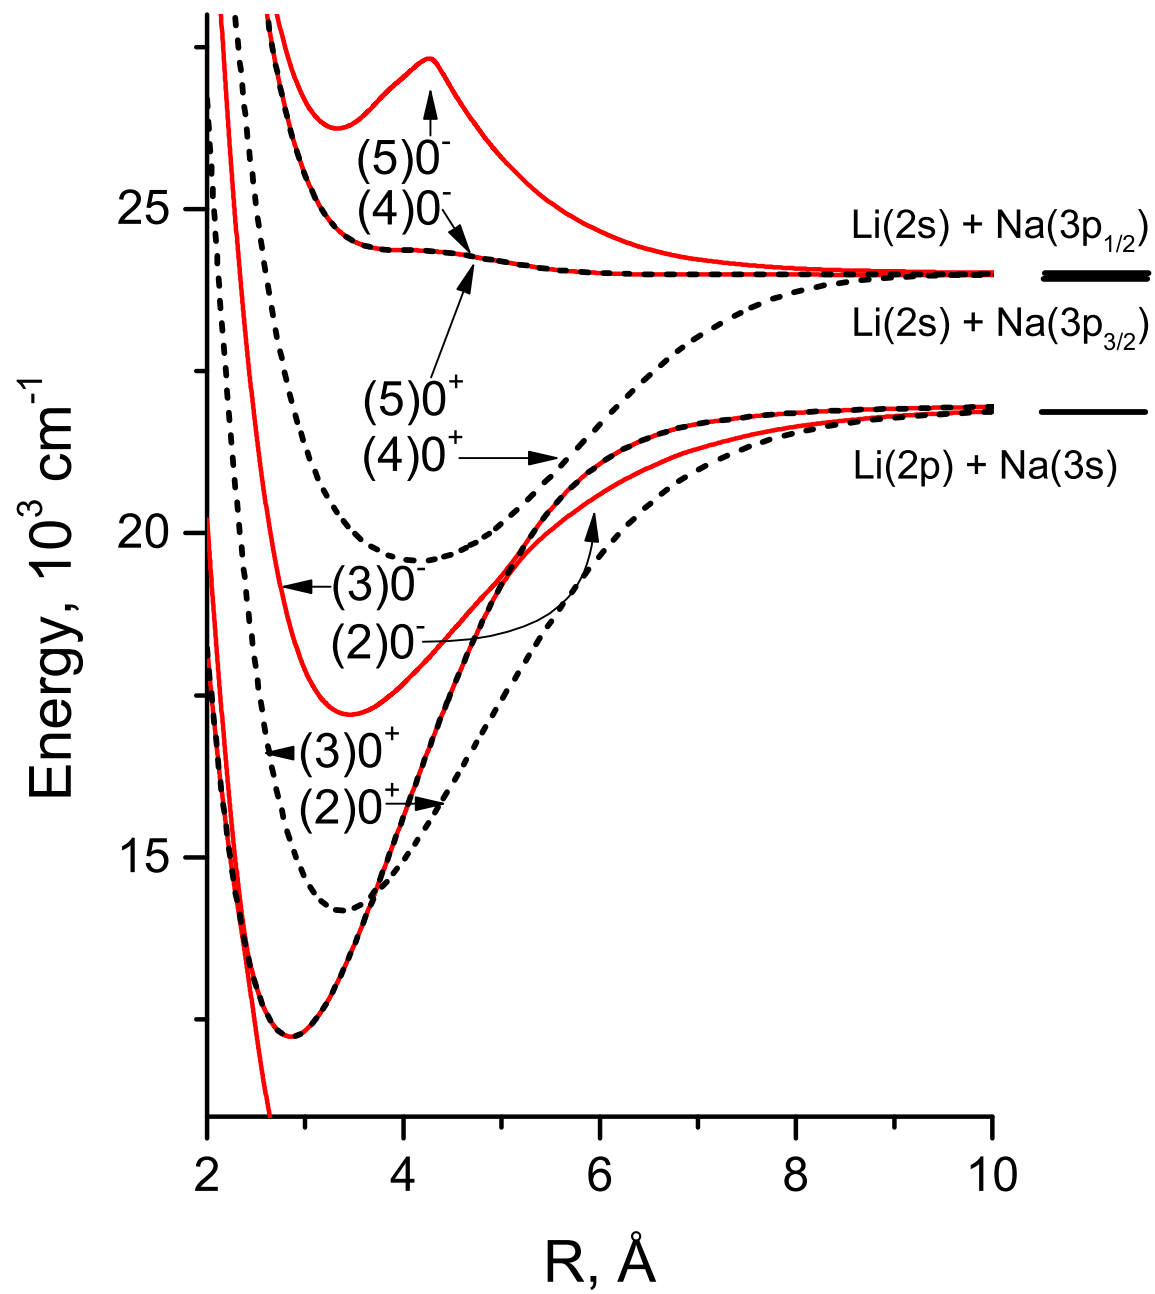

Figure 2: The scheme of the relativistic FS-RCC energies of LiNa.

# LiNa (1,2)

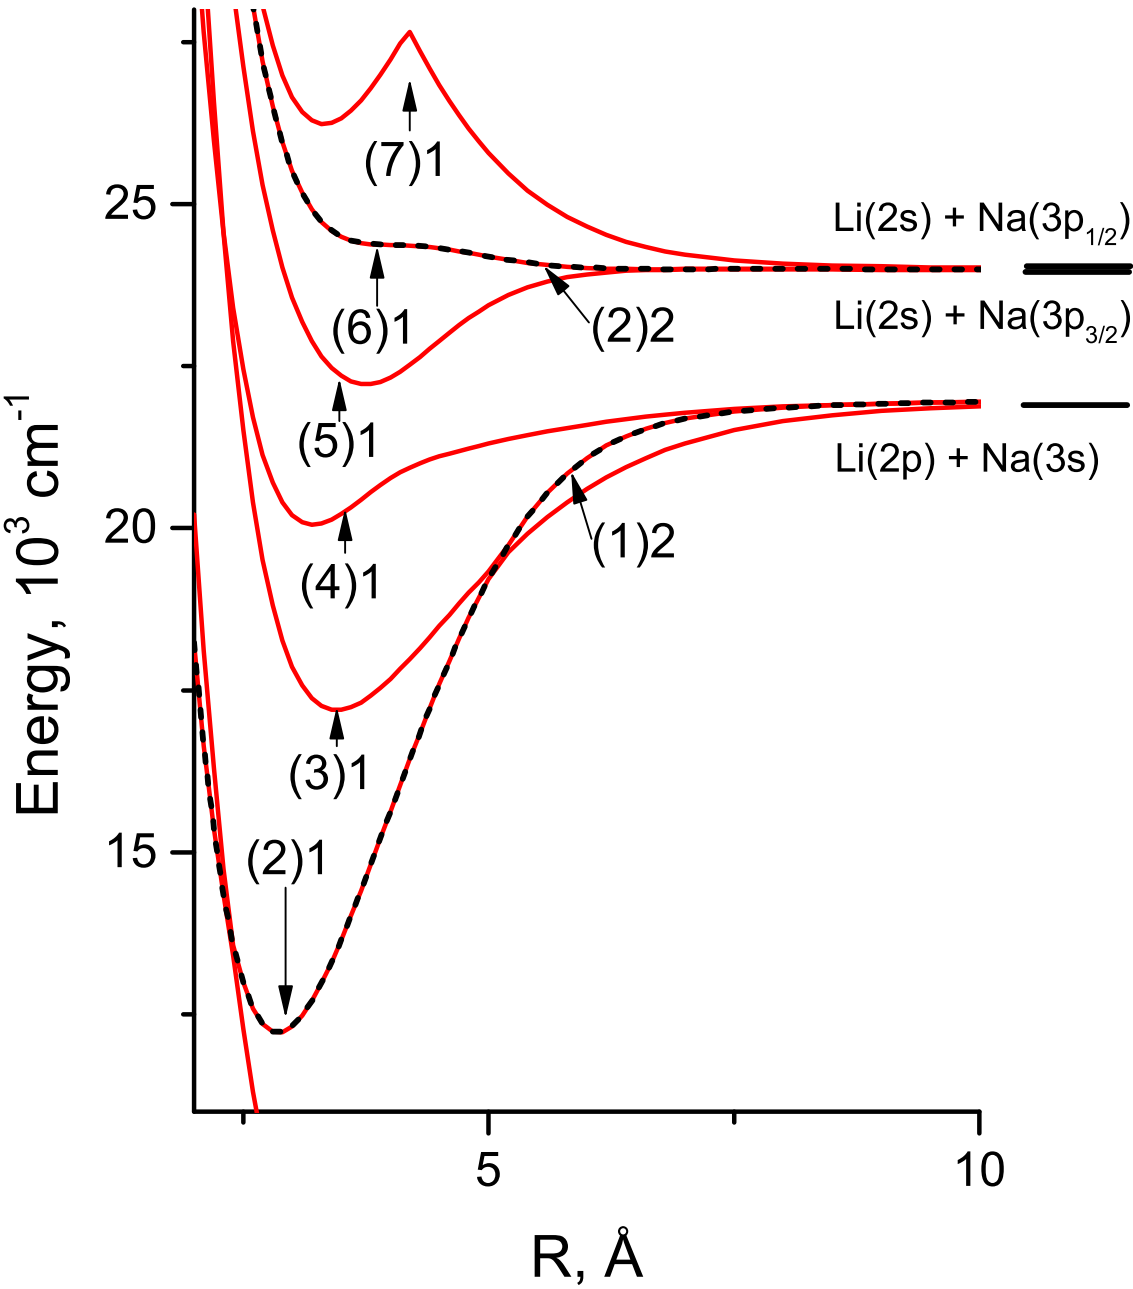

Figure 3: The scheme of the relativistic FS-RCC energies of LiNa.

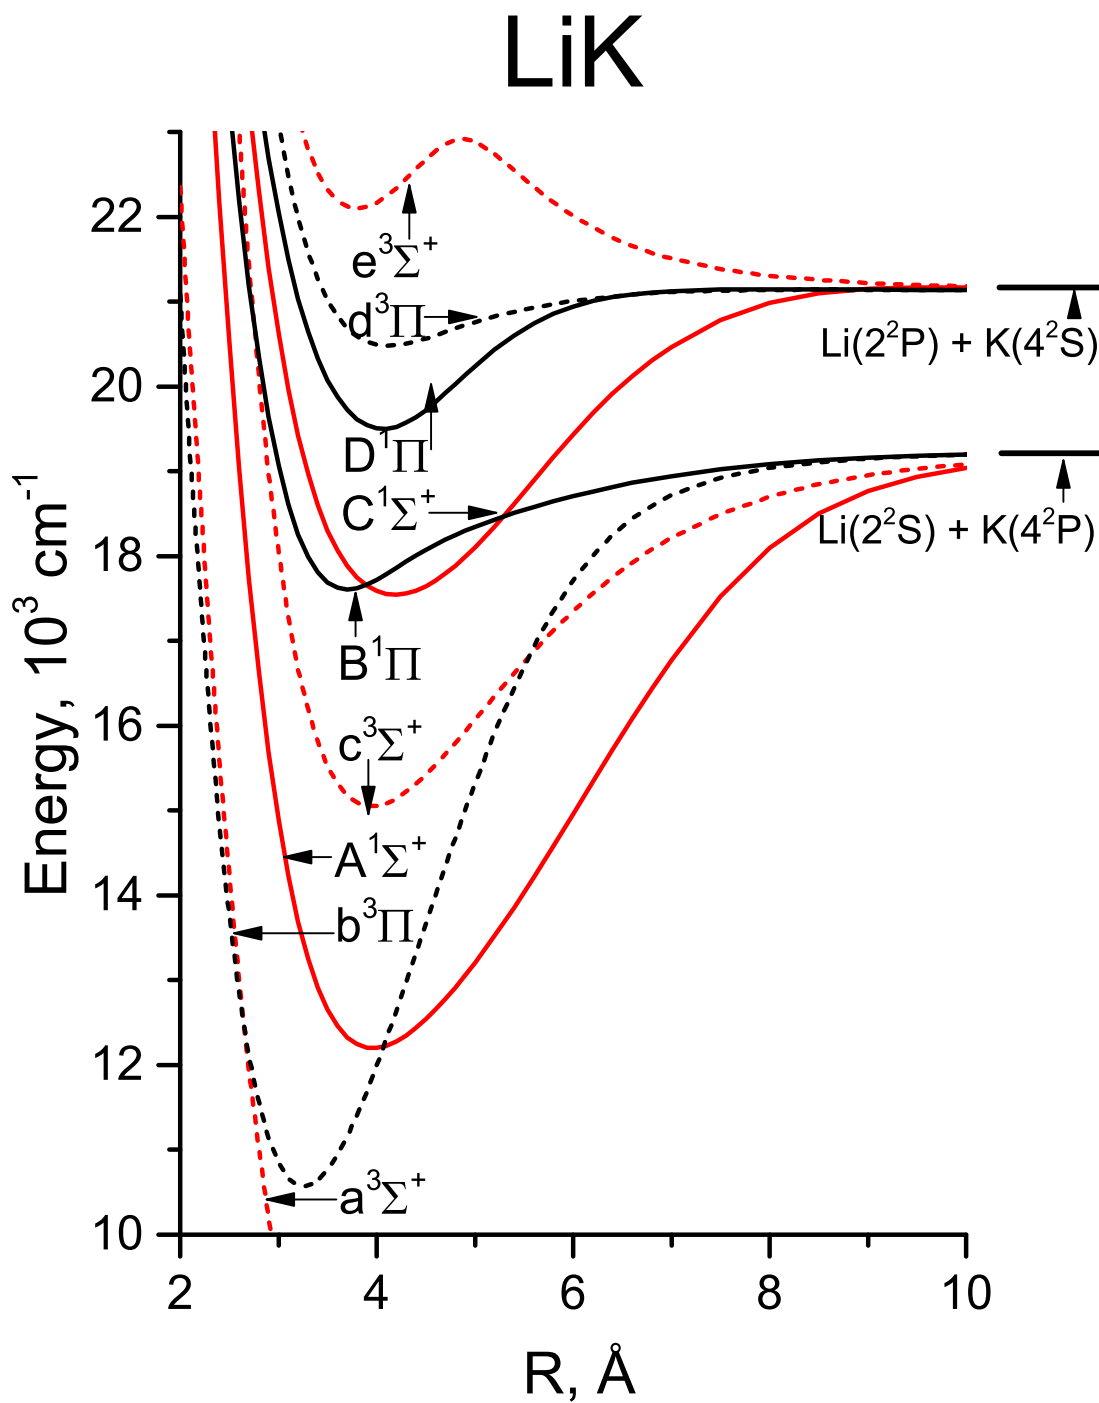

Figure 4: The scheme of the scalar-relativistic CI-CPP energies of LiK.

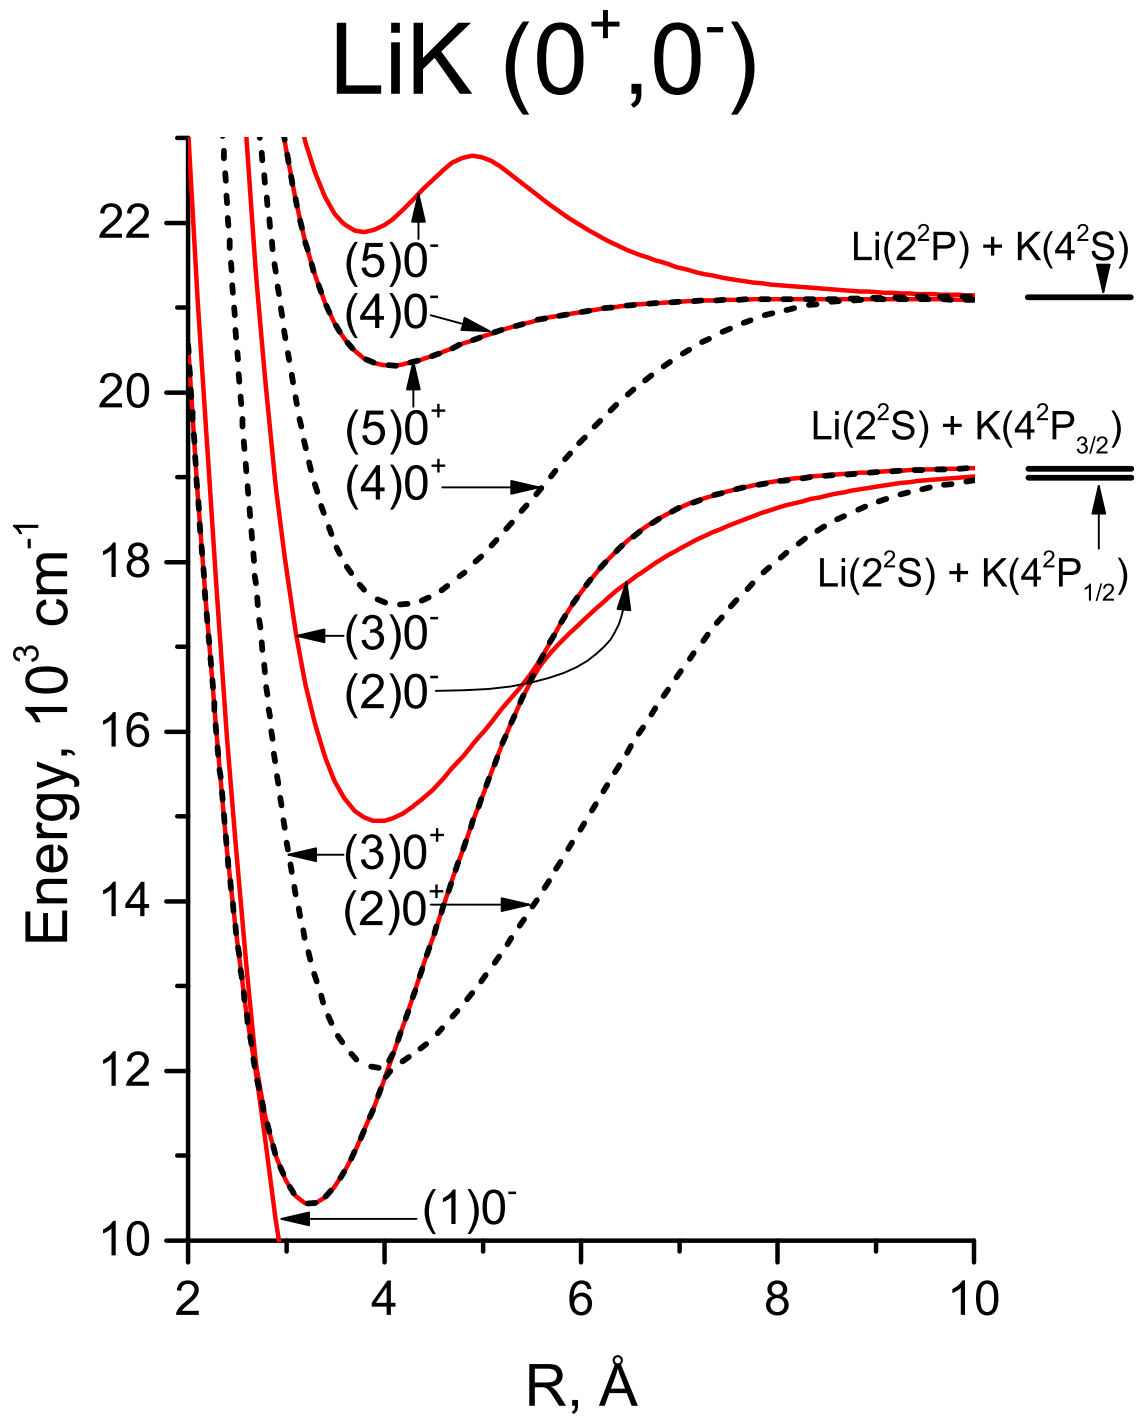

Figure 5: The scheme of the relativistic FS-RCC energies of LiK.

# LiK (1,2)

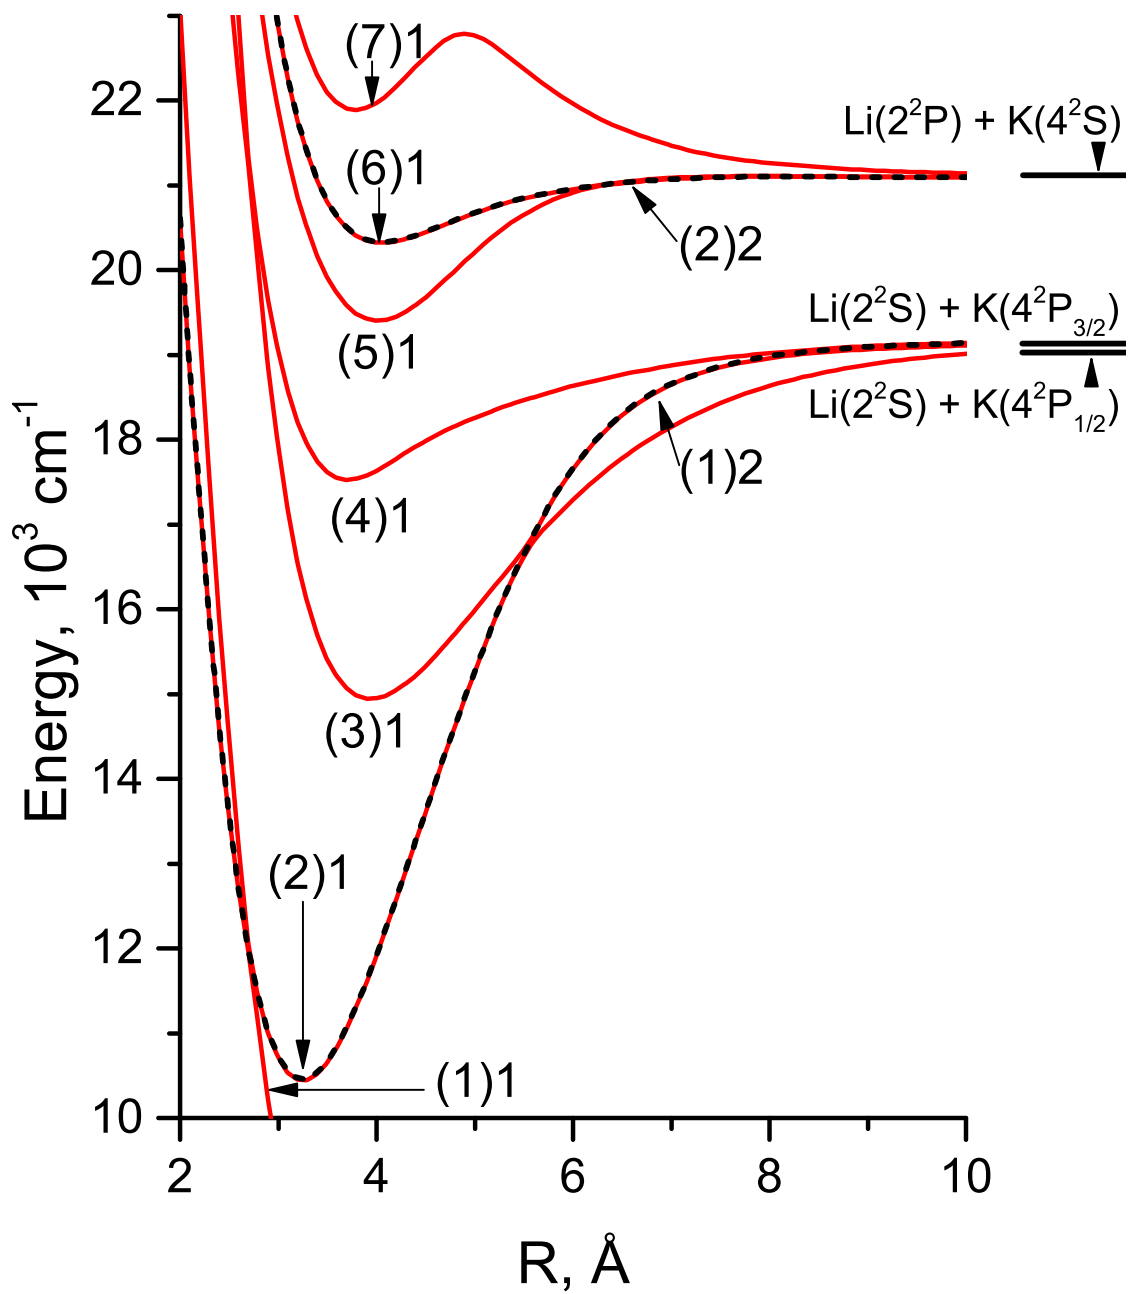

Figure 6: The scheme of the relativistic FS-RCC energies of LiK.

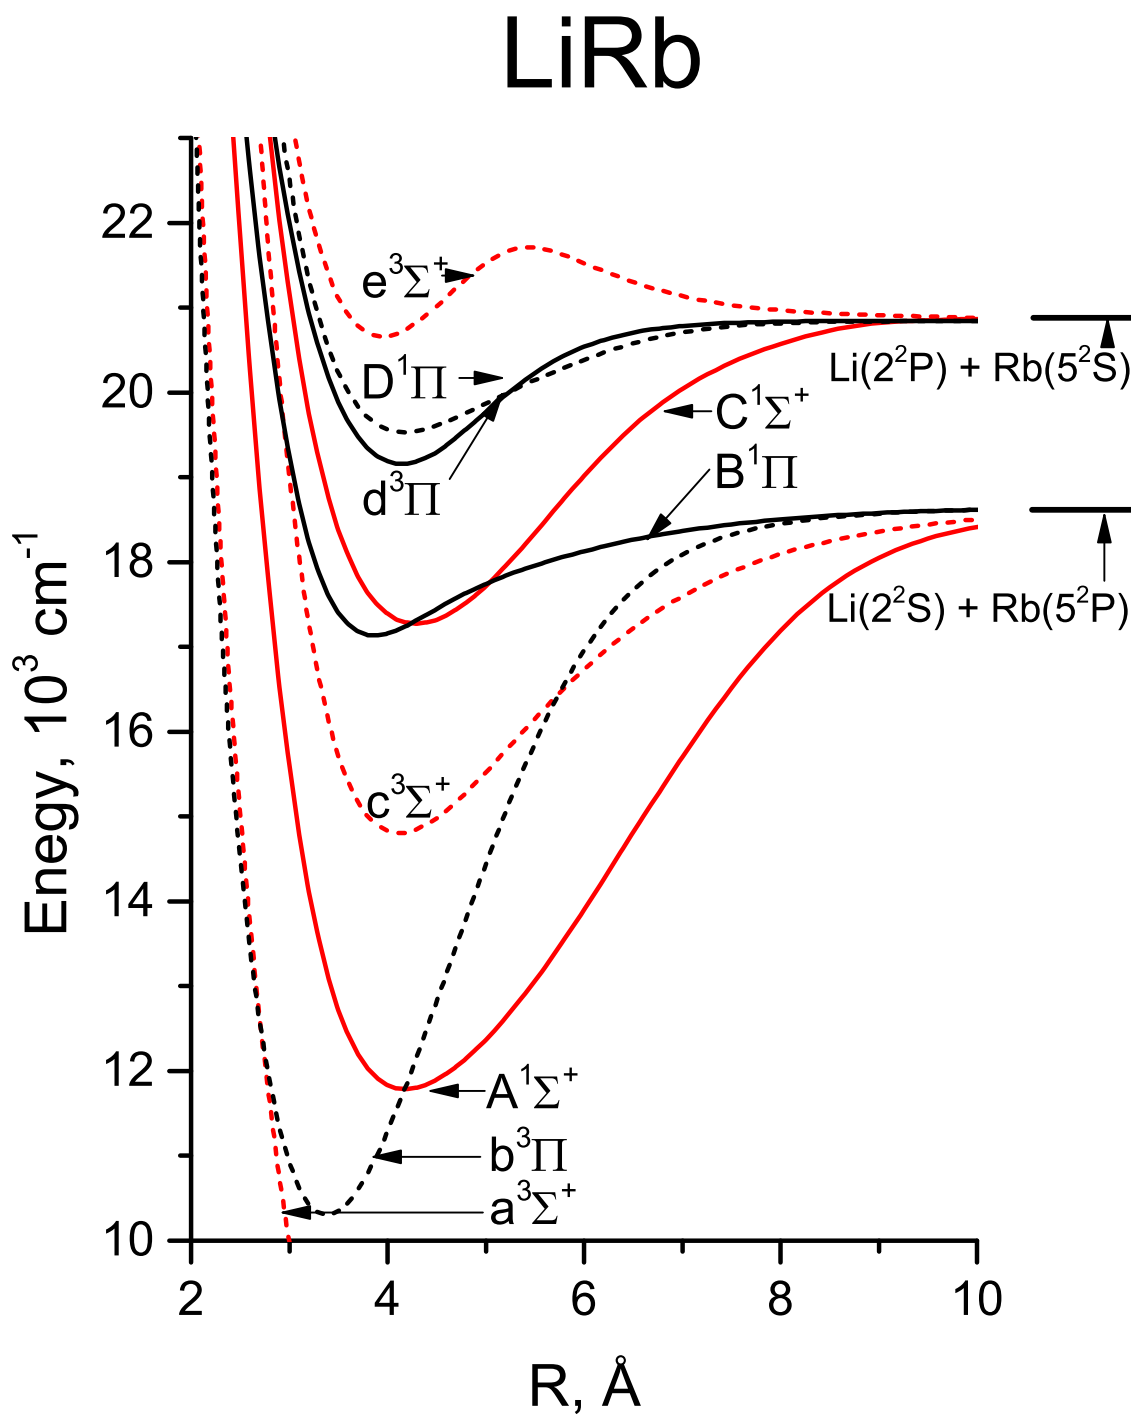

Figure 7: The scheme of the scalar-relativistic CI-CPP energies of LiRb.

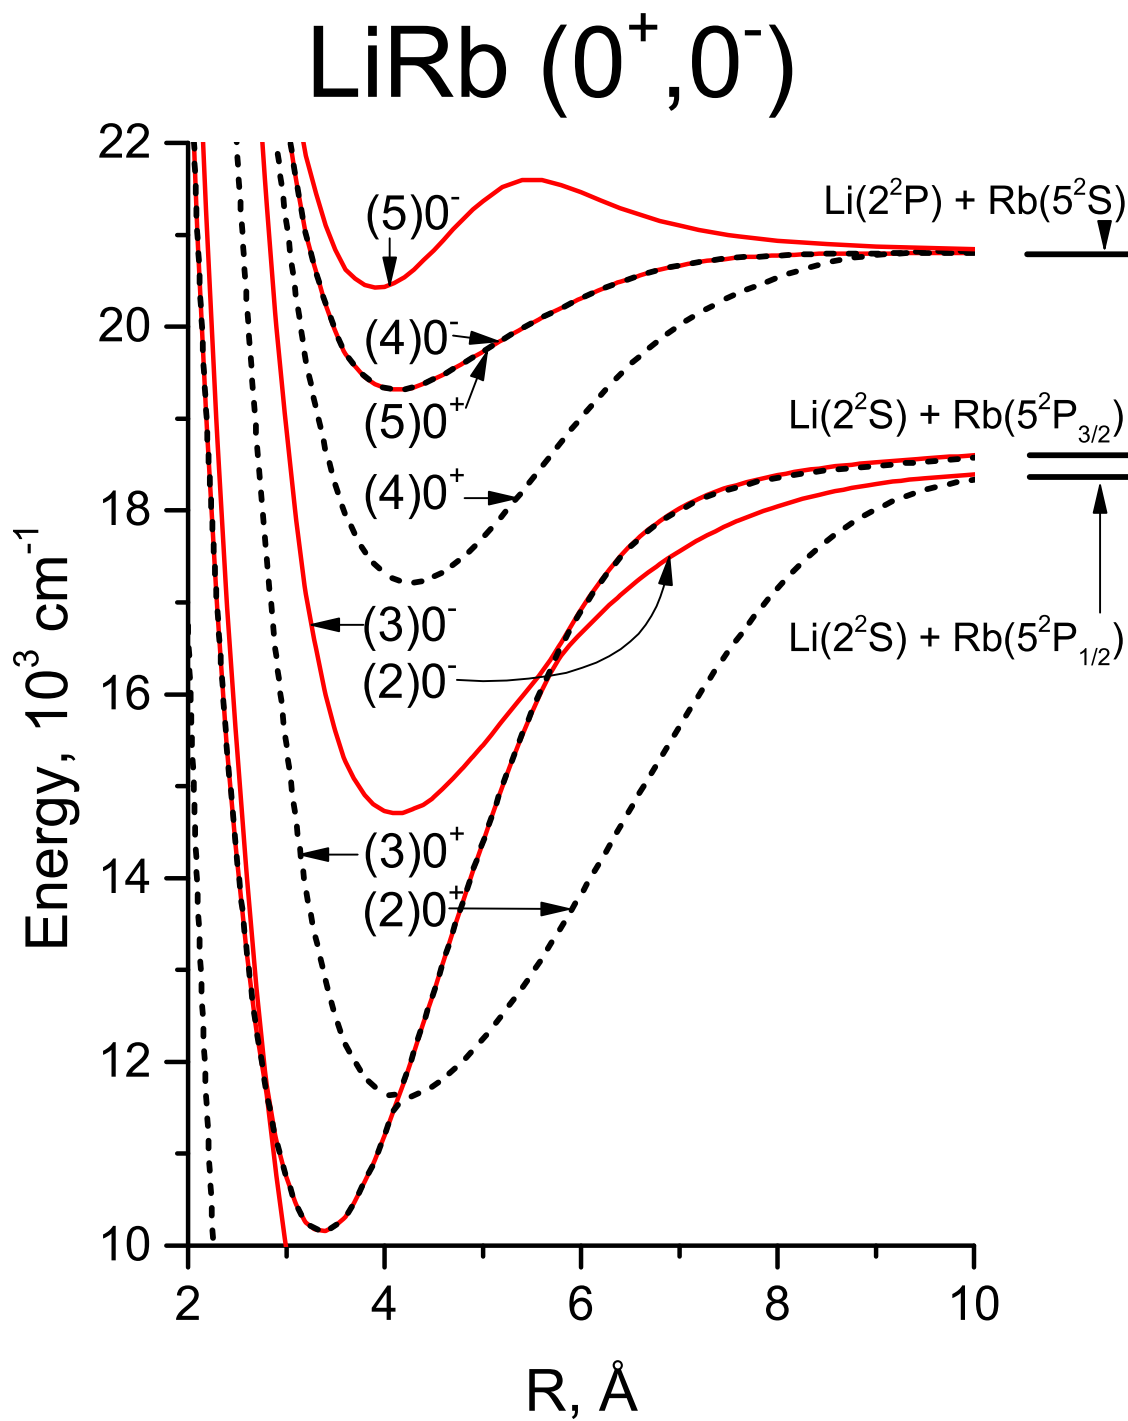

Figure 8: The scheme of the relativistic FS-RCC energies of LiRb.



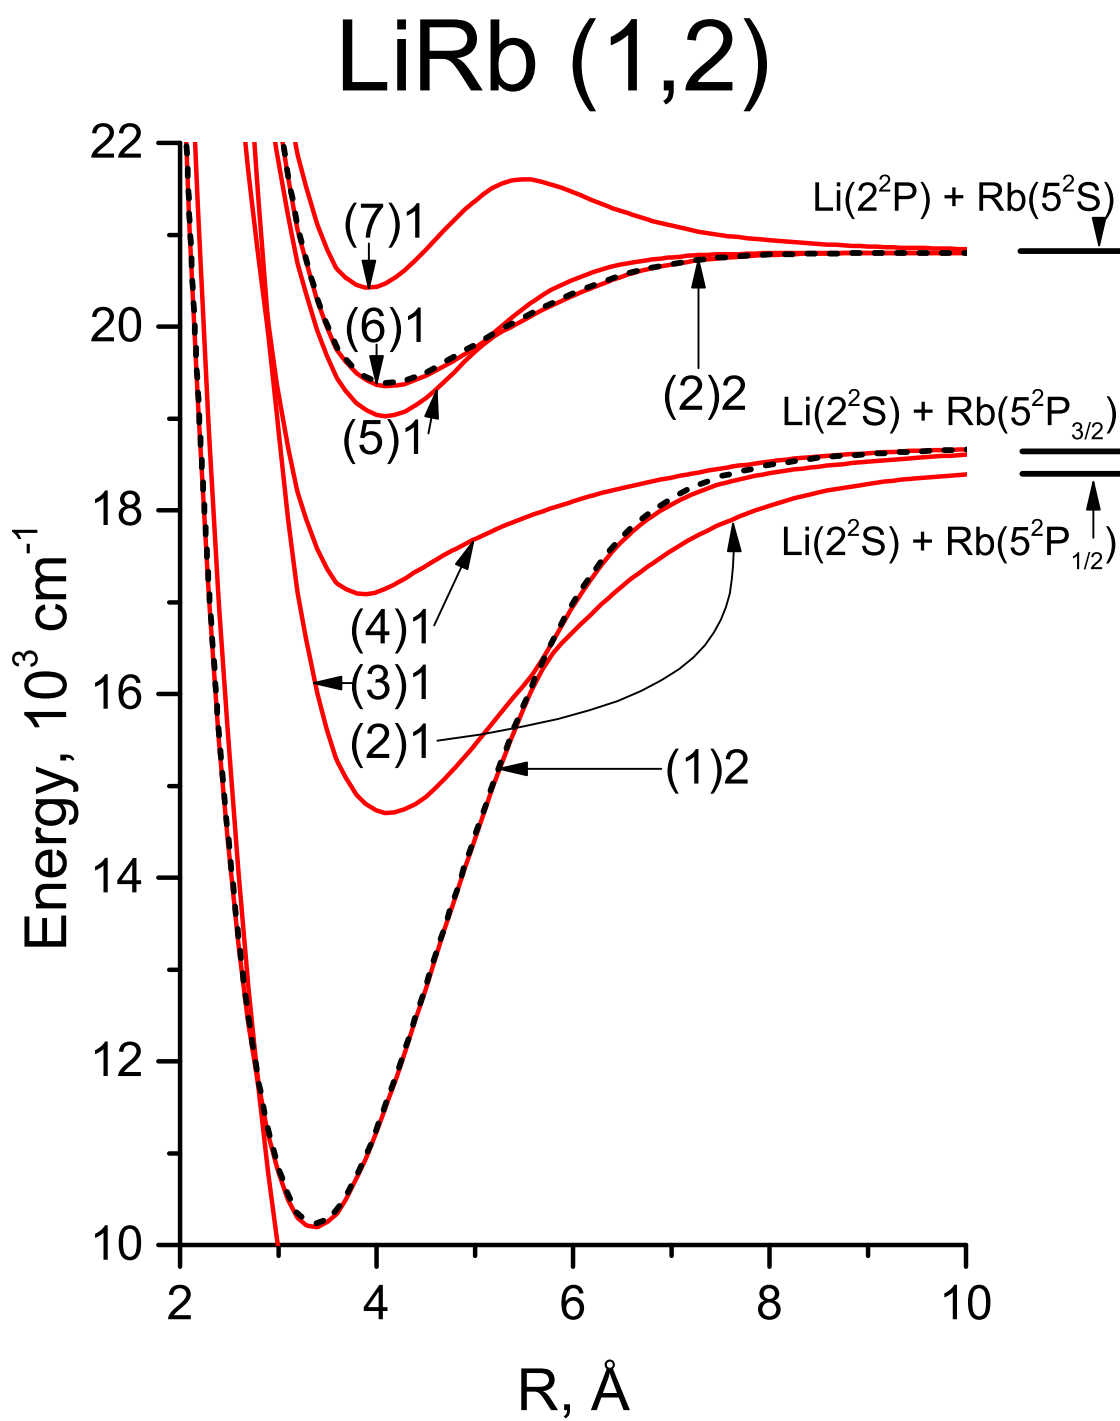

Figure 9: The scheme of the relativistic FS-RCC energies of LiRb.
