# Supplementary material for: A first principles study of the spin–orbit coupling effect in LiM (M = Na, K, Rb, Cs) molecules
Source: Royal Society of Chemistry journal article supplement (doi:10.1039/c9cp06421d), 2020-01-01
Supplement: c9cp06421d1.zip [file c9cp06421d1.zip]

# 1 LiNa

Table 1: The electronic energies,  $T_e$  (in  $\text{cm}^{-1}$ ), and equilibrium distances,  $R_e$  (in  $\text{\AA}$ ), of theoretical and experimental interatomic potentials constructed for the excited LiNa states in the framework of pure Hund's coupling case "a".

| State         | $R_e$        | $T_e$           | Method       | Ref.      |
|---------------|--------------|-----------------|--------------|-----------|
| $A^1\Sigma^+$ | 3.38         | 14228           | CI-CPP       | This work |
|               | 3.36         | 14101           | CI- $l$ -CPP | [13]      |
|               | <i>3.371</i> | <i>14205.28</i> | Exp.         | [4]       |
| $C^1\Sigma^+$ | 4.15         | 19633           | CI-CPP       | This work |
|               | 4.16         | 19675           | CI- $l$ -CPP | [13]      |
|               | <i>4.138</i> | <i>19610.93</i> | Exp.         | [3]       |
| $a^3\Sigma^+$ | 4.77         | 6887            | CI-CPP       | This work |
|               | 4.72         | 6834            | CI- $l$ -CPP | [13]      |
|               | <i>4.706</i> | <i>6871.483</i> | Exp.         | [20]      |
| $c^3\Sigma^+$ | 3.45         | 17237           | CI-CPP       | This work |
|               | 3.44         | 17160           | CI- $l$ -CPP | [13]      |
| $e^3\Sigma^+$ | 3.33         | 26282           | CI-CPP       | This work |
| $B^1\Pi$      | 3.22         | 20087           | CI-CPP       | This work |
|               | 3.23         | 20239           | CI- $l$ -CPP | [13]      |
|               | <i>3.208</i> | <i>20088</i>    | Exp.         | [3]       |
| $D^1\Pi$      | 3.76         | 22296           | CI-CPP       | This work |
|               | 3.73         | 22300           | CI- $l$ -CPP | [13]      |
|               | <i>3.761</i> | <i>22299.66</i> | Exp.         | [1]       |
| $b^3\Pi$      | 2.86         | 12275           | CI-CPP       | This work |
|               | 2.84         | 12255           | CI- $l$ -CPP | [13]      |

Table 2: The electronic energies,  $T_e$  (in  $\text{cm}^{-1}$ ), and equilibrium distances,  $R_e$  (in  $\text{\AA}$ ), of theoretical and experimental interatomic potentials constructed for the excited LiNa states in the framework of pure Hund's coupling case "c".

| State                 | $R_e$        | $T_e$           | Method | Ref.      |
|-----------------------|--------------|-----------------|--------|-----------|
| (2)0 <sup>+</sup>     | 2.85         | 12216           | FS-RCC | This work |
| (3)0 <sup>+</sup>     | 3.38         | 14170           | FS-RCC | This work |
| (4)0 <sup>+</sup>     | 4.18         | 19573           | FS-RCC | This work |
|                       | <i>4.138</i> | <i>19610.93</i> | Exp.   | [3]       |
| (1)0 <sup>-</sup> , 1 | 4.71         | 6879            | FS-RCC | This work |
|                       | <i>4.706</i> | <i>6871.483</i> | Exp.   | [20]      |
| (2)0 <sup>-</sup>     | 2.85         | 12216           | FS-RCC | This work |
| (3)0 <sup>-</sup>     | 3.46         | 17194           | FS-RCC | This work |
| (5)0 <sup>-</sup>     | 3.33         | 26235           | FS-RCC | This work |
| (2)1                  | 2.85         | 12219           | FS-RCC | This work |
| (3)1                  | 3.46         | 17194           | FS-RCC | This work |
| (4)1                  | 3.22         | 20053           | FS-RCC | This work |
|                       | <i>3.208</i> | <i>20088</i>    | Exp.   | [3]       |
| (5)1                  | 3.75         | 22223           | FS-RCC | This work |
|                       | <i>3.761</i> | <i>22299.66</i> | Exp.   | [1]       |
| (7)1                  | 3.33         | 26235           | FS-RCC | This work |
| (1)2                  | 2.85         | 12222           | FS-RCC | This work |

## 2 LiK

Table 3: The electronic energies,  $T_e$  (in  $\text{cm}^{-1}$ ), and equilibrium distances,  $R_e$  (in  $\text{\AA}$ ), of theoretical and experimental interatomic potentials constructed for the excited LiK states in the framework of pure Hund's coupling case "a".

| State         | $R_e$ , $\text{\AA}$ | $T_e$ , $\text{cm}^{-1}$ | Method   | Ref.      |
|---------------|----------------------|--------------------------|----------|-----------|
| $A^1\Sigma^+$ | 3.96                 | 12199                    | CI-CPP   | This work |
|               | 3.92                 | 12056                    | CI-l-CPP | [17]      |
|               | 3.95                 | 12026                    | FS-RCC   | [15]      |
|               | <i>3.947</i>         | <i>12097.11</i>          | Exp.     | [7]       |
| $C^1\Sigma^+$ | 4.19                 | 17545                    | CI-CPP   | This work |
|               | 4.13                 | 17647                    | CI-l-CPP | [17]      |
|               | 4.15                 | 17669                    | FS-RCC   | [15]      |
|               | <i>4.190</i>         | <i>17501.178</i>         | Exp.     | [16]      |
| $a^3\Sigma^+$ | 5.06                 | 5960                     | CI-CPP   | This work |
|               | 4.97                 | 5947                     | CI-l-CPP | [17]      |
|               | <i>4.993</i>         | <i>5929.868</i>          | Exp      | [24]      |
| $c^3\Sigma^+$ | 3.95                 | 15049                    | CI-CPP   | This work |
|               | 3.93                 | 14961                    | FS-RCC   | [15]      |
|               | 3.92                 | 14931                    | CI-l-CPP | [17]      |
| $e^3\Sigma^+$ | 3.80                 | 22096                    | CI-CPP   | This work |
| $B^1\Pi$      | 3.70                 | 17607                    | CI-CPP   | This work |
|               | 3.76                 | 17725                    | CI-l-CPP | [17]      |
|               | 3.73                 | 17732                    | FS-RCC   | [15]      |
|               | <i>3.713</i>         | <i>17572.760</i>         | Exp.     | [16]      |
| $D^1\Pi$      | 4.07                 | 19500                    | CI-CPP   | This work |
|               | 4.02                 | 19541                    | CI-l-CPP | [17]      |
|               | 4.00                 | 19356                    | FS-RCC   | [15]      |
|               | <i>4.043</i>         | <i>19455.73</i>          | Exp.     | [5]       |
| $b^3\Pi$      | 3.26                 | 10565                    | CI-CPP   | This work |
|               | 3.23                 | 10475                    | CI-l-CPP | [17]      |
|               | 3.24                 | 10525                    | FS-RCC   | [15]      |
| $d^3\Pi$      | 4.12                 | 20479                    | CI-CPP   | This work |
|               | 4.02                 | 20388                    | CI-l-CPP | [17]      |
|               | 4.11                 | 20365                    | FS-RCC   | [15]      |

Table 4: The electronic energies,  $T_e$  (in  $\text{cm}^{-1}$ ), and equilibrium distances,  $R_e$  (in  $\text{\AA}$ ), of theoretical and experimental interatomic potentials constructed for the excited LiK states in the framework of pure Hund's coupling case “c”.

| State                    | $R_e$ , $\text{\AA}$ | $T_e$ , $\text{cm}^{-1}$ | Method | Ref.      |
|--------------------------|----------------------|--------------------------|--------|-----------|
| (2)0 <sup>+</sup>        | 3.24                 | 10433                    | FS-RCC | This work |
| (3)0 <sup>+</sup>        | 3.96                 | 12018                    | FS-RCC | This work |
| (4)0 <sup>+</sup>        | 4.13                 | 17492                    | FS-RCC | This work |
|                          | <i>4.190</i>         | <i>17501.178</i>         | Exp.   | [16]      |
| (5)0 <sup>+</sup>        | 4.06                 | 20314                    | FS-RCC | This work |
| (1)0 <sup>-</sup> , (1)1 | 4.95                 | 5935                     | FS-RCC | This work |
|                          | <i>4.993</i>         | <i>5929.868</i>          | Exp    | [24]      |
| (2)0 <sup>-</sup>        | 3.24                 | 10433                    | FS-RCC | This work |
| (3)0 <sup>-</sup>        | 3.94                 | 14945                    | FS-RCC | This work |
| (4)0 <sup>-</sup>        | 4.06                 | 20314                    | FS-RCC | This work |
| (5)0 <sup>-</sup>        | 3.79                 | 21893                    | FS-RCC | This work |
| (2)1                     | 3.25                 | 10443                    | FS-RCC | This work |
| (3)1                     | 3.95                 | 14945                    | FS-RCC | This work |
| (4)1                     | 3.71                 | 17528                    | FS-RCC | This work |
|                          | <i>3.713</i>         | <i>17572.760</i>         | Exp.   | [16]      |
| (5)1                     | 4.02                 | 19405                    | FS-RCC | This work |
|                          | <i>4.043</i>         | <i>19455.73</i>          | Exp.   | [5]       |
| (6)1                     | 4.06                 | 20322                    | FS-RCC | This work |
| (7)1                     | 3.79                 | 21893                    | FS-RCC | This work |
| (1)2                     | 3.25                 | 10454                    | FS-RCC | This work |
| (2)2                     | 4.06                 | 20330                    | FS-RCC | This work |

### 3 LiRb

Table 5: The electronic energies,  $T_e$  (in  $\text{cm}^{-1}$ ), and equilibrium distances,  $R_e$  (in  $\text{\AA}$ ), of theoretical and experimental interatomic potentials constructed for the excited LiRb states in the framework of pure Hund's coupling case "a".

| state         | $R_e, \text{\AA}$ | $T_e, \text{cm}^{-1}$ | Method   | Ref.      |
|---------------|-------------------|-----------------------|----------|-----------|
| $A^1\Sigma^+$ | 4.18              | 11789                 | CI-CPP   | This work |
|               | 4.14              | 11639                 | CI-l-CPP | [10]      |
|               | —                 | <i>11677.8</i>        | Exp.     | [22]      |
| $C^1\Sigma^+$ | 4.29              | 17274                 | CI-CPP   | This work |
|               | 4.26              | 17348                 | CI-l-CPP | [10]      |
|               | <i>4.283</i>      | <i>17230.571</i>      | Exp.     | [9]       |
| $a^3\Sigma^+$ | 5.28              | 5686                  | CI-CPP   | This work |
|               | 5.13              | 5678                  | CI-l-CPP | [10]      |
|               | <i>5.110</i>      | <i>5650.529</i>       | Exp.     | [8]       |
| $c^3\Sigma^+$ | 4.12              | 14806                 | CI-CPP   | This work |
|               | 4.06              | 14719                 | CI-l-CPP | [10]      |
| $e^3\Sigma^+$ | 3.95              | 20657                 | CI-CPP   | This work |
| $B^1\Pi$      | 3.86              | 17134                 | CI-CPP   | This work |
|               | 3.81              | 17205                 | CI-l-CPP | [10]      |
|               | <i>3.875</i>      | <i>17110.406</i>      | Exp.     | [9]       |
| $D^1\Pi$      | 4.15              | 19158                 | CI-CPP   | This work |
|               | 4.10              | 19201                 | CI-l-CPP | [10]      |
|               | <i>4.115</i>      | <i>19089.88</i>       | Exp.     | [9]       |
| $b^3\Pi$      | 3.38              | 10301                 | CI-CPP   | This work |
|               | 3.34              | 10233                 | CI-l-CPP | [10]      |
| $d^3\Pi$      | 4.17              | 19531                 | CI-CPP   | This work |
|               | 4.11              | 19484                 | CI-l-CPP | [10]      |

Table 6: The electronic energies,  $T_e$  (in  $\text{cm}^{-1}$ ), and equilibrium distances,  $R_e$  (in  $\text{\AA}$ ), of theoretical and experimental interatomic potentials constructed for the excited LiRb states in the framework of pure Hund's coupling case “c”.

| State                    | $R_e$ , $\text{\AA}$ | $T_e$ , $\text{cm}^{-1}$ | Method   | Ref.      |
|--------------------------|----------------------|--------------------------|----------|-----------|
| (2)0 <sup>+</sup>        | 3.37                 | 10155                    | FS-RCC   | This work |
|                          | 3.29                 | 10192                    | CI-l-CPP | [11]      |
|                          | –                    | <i>10005.186</i>         | Exp.     | [22]      |
| (3)0 <sup>+</sup>        | 4.07                 | 11625                    | FS-RCC   | This work |
| (4)0 <sup>+</sup>        | 4.27                 | 17215                    | FS-RCC   | This work |
|                          | 4.21                 | 17468                    | CI-l-CPP | [11]      |
| (5)0 <sup>+</sup>        | 4.12                 | 19316                    | FS-RCC   | This work |
|                          | 4.06                 | 19528                    | CI-l-CPP | [11]      |
|                          | <i>4.19</i>          | <i>19383.4</i>           | Exp.     | [21]      |
| (2)0 <sup>−</sup> , (1)1 | 5.07                 | 5635                     | FS-RCC   | This work |
|                          | 5.00                 | 5856                     | CI-l-CPP | [11]      |
|                          | <i>5.110</i>         | <i>5650.529</i>          | Exp.     | [8]       |
| (2)0 <sup>−</sup>        | 3.37                 | 10156                    | FS-RCC   | This work |
|                          | 3.29                 | 10194                    | CI-l-CPP | [11]      |
| (3)0 <sup>−</sup>        | 4.13                 | 14706                    | FS-RCC   | This work |
|                          | 4.03                 | 14867                    | CI-l-CPP | [11]      |
| (4)0 <sup>−</sup>        | 4.12                 | 19315                    | FS-RCC   | This work |
|                          | 4.06                 | 19564                    | CI-l-CPP | [11]      |
| (5)0 <sup>−</sup>        | 3.92                 | 20423                    | FS-RCC   | This work |
|                          | 3.87                 | 20611                    | CI-l-CPP | [11]      |
| (2)1                     | 3.38                 | 10195                    | FS-RCC   | This work |
|                          | 3.29                 | 10226                    | CI-l-CPP | [11]      |
| (3)1                     | 4.13                 | 14706                    | FS-RCC   | This work |
|                          | 4.03                 | 14866                    | CI-l-CPP | [11]      |
| (4)1                     | 3.86                 | 17089                    | FS-RCC   | This work |
|                          | 3.82                 | 17315                    | CI-l-CPP | [11]      |
|                          | <i>3.875</i>         | <i>17110.406</i>         | Exp.     | [9]       |
| (5)1                     | 4.10                 | 19028                    | FS-RCC   | This work |
|                          | 4.04                 | 19341                    | CI-l-CPP | [11]      |
|                          | <i>4.115</i>         | <i>19089.88</i>          | Exp.     | [9]       |
| (6)1                     | 4.12                 | 19352                    | FS-RCC   | This work |
|                          | 4.06                 | 19586                    | CI-l-CPP | [11]      |
|                          | <i>4.12</i>          | <i>19420.7</i>           | Exp.     | [21]      |
| (7)1                     | 3.91                 | 20423                    | FS-RCC   | This work |
|                          | 3.87                 | 20608                    | CI-l-CPP | [11]      |
| (1)2                     | 3.38                 | 10235                    | FS-RCC   | This work |
|                          | 3.28                 | 10228                    | CI-l-CPP | [11]      |
| (2)2                     | 4.12                 | 19386                    | FS-RCC   | This work |
|                          | 4.06                 | 19625                    | CI-l-CPP | [11]      |
|                          | –                    | <i>19453.2</i>           | Exp.     | [21]      |

## 4 LiCs

Table 7: The electronic energies,  $T_e$  (in  $\text{cm}^{-1}$ ), and equilibrium distances,  $R_e$  (in  $\text{\AA}$ ), of theoretical and experimental interatomic potentials constructed for the excited LiCs states in the framework of pure Hund's coupling case "a".

| state           | $R_e$ , $\text{\AA}$ | $T_e$ , $\text{cm}^{-1}$ | Method   | Ref.      |
|-----------------|----------------------|--------------------------|----------|-----------|
| $A^1\Sigma^+$   | 4.47                 | 10777                    | CI-CPP   | This work |
|                 | 4.38                 | 10715                    | CI-l-CPP | [14]      |
|                 | <i>4.432</i>         | <i>10657.41</i>          | Exp.     | [12]      |
| $C^1\Sigma^+$   | 4.37                 | 16846                    | CI-CPP   | This work |
|                 | 4.32                 | 16932                    | CI-l-CPP | [14]      |
|                 | <i>4.370</i>         | <i>16786.43</i>          | Exp.     | [6]       |
| $(4)^1\Sigma^+$ | 5.55                 | 19021                    | CI-CPP   | This work |
|                 | 5.01                 | 19081                    | CI-l-CPP | [14]      |
|                 | <i>4.91</i>          | <i>18848.4</i>           | Exp.     | [23]      |
| $a^3\Sigma^+$   | 5.47                 | 5636                     | CI-CPP   | This work |
|                 | 5.23                 | 5725                     | CI-l-CPP | [14]      |
|                 | <i>5.247</i>         | <i>5566.090</i>          | Exp.     | [18]      |
| $c^3\Sigma^+$   | 4.23                 | 13828                    | CI-CPP   | This work |
|                 | 4.11                 | 13730                    | CI-l-CPP | [14]      |
| $e^3\Sigma^+$   | 4.19                 | 17746                    | CI-CPP   | This work |
|                 | 4.16                 | 17779                    | CI-l-CPP | [14]      |
|                 | <i>4.314</i>         | <i>17727.19</i>          | Exp.     | [6]       |
| $(4)^3\Sigma^+$ | 4.35                 | 22296                    | CI-CPP   | This work |
| $B^1\Pi$        | 4.11                 | 16055                    | CI-CPP   | This work |
|                 | 4.08                 | 16165                    | CI-l-CPP | [14]      |
|                 | <i>4.122</i>         | <i>16012.217</i>         | Exp.     | [19]      |
| $D^1\Pi$        | 4.06                 | 18378                    | CI-CPP   | This work |
|                 | 4.02                 | 18570                    | CI-l-CPP | [14]      |
|                 | <i>4.062</i>         | <i>18293.37</i>          | Exp.     | [19]      |
| $(3)^1\Pi$      | 5.53                 | 19998                    | CI-CPP   | This work |
|                 | 5.24                 | 20123                    | CI-l-CPP | [14]      |
| $b^3\Pi$        | 3.52                 | 9295                     | CI-CPP   | This work |
|                 | 3.43                 | 9063                     | CI-l-CPP | [14]      |
| $d^3\Pi$        | 4.26                 | 17389                    | CI-CPP   | This work |
|                 | 4.17                 | 17287                    | CI-l-CPP | [14]      |
|                 | <i>4.314</i>         | <i>17368.12</i>          | Exp.     | [6]       |
| $(1)^1\Delta$   | 3.96                 | 18901                    | CI-CPP   | This work |
|                 | 3.94                 | 18963                    | CI-l-CPP | [14]      |
| $(1)^3\Delta$   | 4.15                 | 19317                    | CI-CPP   | This work |
|                 | 4.13                 | 19381                    | CI-l-CPP | [14]      |

Table 8: The electronic energies,  $T_e$  (in  $\text{cm}^{-1}$ ), and equilibrium distances,  $R_e$  (in  $\text{\AA}$ ), of theoretical and experimental interatomic potentials constructed for the excited LiCs states in the framework of pure Hund's coupling case “c”.

| state                    | $R_e$ , $\text{\AA}$ | $T_e$ , $\text{cm}^{-1}$ | Method   | Ref.      |
|--------------------------|----------------------|--------------------------|----------|-----------|
| (2)0 <sup>+</sup>        | 3.50                 | 9085                     | FS-RCC   | This work |
|                          | 3.46                 | 9192                     | CI-I-CPP | [2]       |
|                          | <i>3.528</i>         | <i>9175.05</i>           | Exp.     | [12]      |
| (3)0 <sup>+</sup>        | 4.25                 | 10650                    | FS-RCC   | This work |
| (4)0 <sup>+</sup>        | 4.33                 | 16727                    | FS-RCC   | This work |
|                          | 4.28                 | 16847                    | CI-I-CPP | [2]       |
|                          | <i>4.370</i>         | <i>16786.43</i>          | Exp.     | [6]       |
| (5)0 <sup>+</sup>        | 4.24                 | 17160                    | FS-RCC   | This work |
|                          | 4.12                 | 17252                    | CI-I-CPP | [2]       |
|                          | <i>4.353</i>         | <i>17206.93</i>          | Exp.     | [6]       |
| (6)0 <sup>+</sup>        | 4.92                 | 18789                    | FS-RCC   | This work |
|                          | 4.96                 | 19004                    | CI-I-CPP | [2]       |
| (7)0 <sup>+</sup>        | 4.23                 | 21460                    | FS-RCC   | This work |
|                          | 4.18                 | 21620                    | CI-I-CPP | [2]       |
| (1)0 <sup>-</sup> , (1)1 | 5.18                 | 5580                     | FS-RCC   | This work |
|                          | 5.235                | 5689                     | CI-I-CPP | [2]       |
|                          | <i>5.247</i>         | <i>5566.090</i>          | Exp.     | [18]      |
| (2)0 <sup>-</sup>        | 3.50                 | 9089                     | FS-RCC   | This work |
| (3)0 <sup>-</sup>        | 4.22                 | 13690                    | FS-RCC   | This work |
|                          | 4.10                 | 13683                    | CI-I-CPP | [2]       |
| (4)0 <sup>-</sup>        | 4.21                 | 17098                    | FS-RCC   | This work |
|                          | 4.36                 | 17194                    | CI-I-CPP | [2]       |
| (5)0 <sup>-</sup>        | 4.17                 | 17583                    | FS-RCC   | This work |
|                          | 4.16                 | 17768                    | CI-I-CPP | [2]       |
| (6)0 <sup>-</sup>        | 4.32                 | 22277                    | FS-RCC   | This work |
|                          | 4.28                 | 22449                    | CI-I-CPP | [2]       |
| (7)0 <sup>-</sup>        | 4.61                 | 22386                    | FS-RCC   | This work |
| (2)1                     | 3.50                 | 9168                     | FS-RCC   | This work |
| (3)1                     | 4.22                 | 13684                    | FS-RCC   | This work |
|                          | 4.10                 | 13683                    | CI-I-CPP | [2]       |
| (4)1                     | 4.11                 | 15933                    | FS-RCC   | This work |
|                          | 4.09                 | 16101                    | CI-I-CPP | [2]       |
|                          | <i>4.122</i>         | <i>16012.217</i>         | Exp.     | [19]      |
| (5)1                     | 4.21                 | 17208                    | FS-RCC   | This work |
|                          | 4.21                 | 17365                    | CI-I-CPP | [2]       |
|                          | <i>4.314</i>         | <i>17368.12</i>          | Exp.     | [6]       |
| (6)1                     | 4.17                 | 17575                    | FS-RCC   | This work |
|                          | 4.18                 | 17771                    | CI-I-CPP | [2]       |
|                          | <i>4.314</i>         | <i>17727.19</i>          | Exp.     | [6]       |
| (7)1                     | 4.01                 | 18204                    | FS-RCC   | This work |
|                          | 4.00                 | 18544                    | CI-I-CPP | [2]       |
|                          | <i>4.062</i>         | <i>18293.37</i>          | Exp.     | [19]      |
| (8)1                     | 4.09                 | 19174                    | FS-RCC   | This work |
|                          | 4.16                 | 19389                    | CI-I-CPP | [2]       |
| (9)1                     | 5.30                 | 19905                    | FS-RCC   | This work |
| (10)1                    | 4.31                 | 22279                    | FS-RCC   | This work |
|                          | 4.28                 | 22452                    | CI-I-CPP | [2]       |
| (11)1                    | 4.62                 | 22388                    | FS-RCC   | This work |
| (1)2                     | 3.51                 | 9248                     | FS-RCC   | This work |
|                          | 3.45                 | 9326                     | CI-I-CPP | [2]       |
| (2)2                     | 4.22                 | 17306                    | FS-RCC   | This work |
|                          | 4.23                 | 17506                    | CI-I-CPP | [2]       |
| (3)2                     | 3.92                 | 18771                    | FS-RCC   | This work |
|                          | 3.97                 | 19034                    | CI-I-CPP | [2]       |
| (4)2                     | 4.09                 | 19206                    | FS-RCC   | This work |
|                          | 4.16                 | 19436                    | CI-I-CPP | [2]       |
| (1)3                     | 4.01                 | 19232                    | FS-RCC   | This work |
|                          | 4.16                 | 19474                    | CI-I-CPP | [2]       |

## References

- [1] Nguyen Huy Bang, Dinh Xuan Khoa, Nguyen Tien Dung, J Szczepkowski, W Jastrzebski, P Kowalczyk, and A Pashov. Polarisation labelling spectroscopy of the  $D^1\Pi$  state in  $\text{Na}^7\text{Li}$  molecule. *Chemical Physics Letters*, 586:16–20, 2013.
- [2] N Elkork, D Houalla, and M Korek. Theoretical calculation of the electronic states with spin-orbit effects of the molecule LiCs. *Canadian Journal of Physics*, 87(10):1079–1088, 2009.
- [3] C E Fellows, J Vergès, and C Amiot. The NaLi  $3^1\Sigma^+(\text{C})$  and  $1^1\Pi(\text{B})$  electronic states through collision energy transfer. *The Journal of Chemical Physics*, 93(9):6281–6290, 1990.
- [4] CE Fellows. The nali  $a^1\sigma^+$  electronic state: First high resolution spectroscopic study. *Journal of Molecular Spectroscopy*, 136(2):369–379, 1989.
- [5] A Grochola, W Jastrzebski, P Kowalczyk, P Crozet, and A J Ross. The molecular constants and potential energy curve of the  $D^1\Pi$  state in KLi. *Chemical Physics Letters*, 372(1-2):173–178, 2003.
- [6] A Grochola, J Szczepkowski, W Jastrzebski, and P Kowalczyk. Experimental investigation of electronic states of LiCs dissociating to  $\text{Li}(2^2S)$  and  $\text{Cs}(5^2D)$  atoms. *The Journal of Chemical Physics*, 135(4):044318, 2011.
- [7] A Grochola, J Szczepkowski, W Jastrzebski, and P Kowalczyk. The  $A^1\Sigma^+$  electronic state of KLi molecule. *Chemical Physics Letters*, 535:17–20, 2012.
- [8] M. Ivanova, A. Stein, A. Pashov, H. Knöckel, and E. Tiemann. The  $X^1\Sigma^+$  state of LiRb studied by Fourier-transform spectroscopy. *The Journal of Chemical Physics*, 134(2):024321, 2011.
- [9] M Ivanova, A Stein, A Pashov, H Knöckel, and E Tiemann. The  $B^1\Pi$  and  $D^1\Pi$  states of LiRb. *The Journal of Chemical Physics*, 138(9):094315, 2013.
- [10] M Korek, A R Allouche, M Kobeissi, A Chaalan, M Dagher, K Fakherddin, and M Aubert-Frécon. Theoretical study of the electronic structure of the LiRb and NaRb molecules. *Chemical Physics*, 256(1):1–6, 2000.
- [11] M Korek, G Younes, and S AL-Shawa. Theoretical calculation of the electronic structure of the molecule LiRb including the spin-orbit interaction. *Journal of Molecular Structure: THEOCHEM*, 899:25–31, 2009.
- [12] P Kowalczyk, W Jastrzebski, J Szczepkowski, E A Pazyuk, and A V Stolyarov. Direct coupled-channels deperturbation analysis of the  $A^1\Sigma^+-b^3\Pi$  complex in LiCs with experimental accuracy. *The Journal of Chemical Physics*, 142(23):234308, 2015.
- [13] N Mabrouk and H Berriche. Theoretical study of the nali molecule: potential energy curves, spectroscopic constants, dipole moments and radiative lifetimes. *Journal of Physics B: Atomic, Molecular and Optical Physics*, 41(15):155101, 2008.
- [14] N Mabrouk, H Berriche, H Ben Ouada, and F X Gadea. Theoretical study of the LiCs molecule: adiabatic and diabatic potential energy and dipole moment. *The Journal of Physical Chemistry. A*, 114(24):6657–68, 2010.
- [15] M Musial, A Motyl, P Skupin, and S A Kucharski. Potential Energy Curves for the Low-Lying Electronic States of KLi with Fock Space Coupled Cluster Method. *Advances in Quantum Chemistry*, 72:201–216, 2016.
- [16] A Pashov, W Jastrzebski, and P Kowalczyk. The  $B^1\Pi$  and  $C^1\Sigma^+$  states of KLi. *Chemical Physics Letters*, 292(4-6):615–620, 1998.
- [17] Rousseau, S and Allouche, A R and Aubert-Frécon, M and Magnier, S and Kowalczyk, P and Jastrzebski, W. Theoretical study of the electronic structure of KLi and comparison with experiments. *Chemical Physics*, 247(2):193–199, 1999.



- [18] P Sta anum, A Pashov, H Knöckel, and E Tiemann.  $X^1\Sigma^+$  and  $a^3\Sigma^+$  states of LiCs studied by Fourier-transform spectroscopy. *Physical Review A*, 75(4):042513, 2007.
- [19] A Stein, A Pashov, P F Sta anum, H Knöckel, and E Tiemann. The  $B^1\Pi$  and  $D^1\Pi$  states of LiCs studied by Fourier-transform spectroscopy. *The European Physical Journal D*, 48(2):177–185, 2008.
- [20] M. Steinke, H. Knöckel, and E. Tiemann. The  $X^1\Sigma^+$  state of LiNa studied by Fourier-transform spectroscopy. *Physical Review A*, 85(4):042720, 2012.
- [21] I C Stevenson, D B Blasing, A Altaf, Y P Chen, and D S Elliott. The  $d^3\Pi$  state of LiRb. *The Journal of Chemical Physics*, 145(22):224301, 2016.
- [22] I C Stevenson, D B Blasing, Y P Chen, and D S Elliott.  $C^1\Sigma^+$ ,  $A^1\Sigma^+$ , and  $b^3\Pi_{0+}$  states of LiRb. *Physical Review A*, 94(6):062503, 2016.
- [23] J Szczepkowski, P Jasik, A Grochola, W Jastrzebski, J E Sienkiewicz, and P Kowalczyk. The  $4^1\Sigma^+$  electronic state of LiCs molecule. *The European Physical Journal Special Topics*, 222(9):2329–2333, 2013.
- [24] E Tiemann, H Knöckel, P Kowalczyk, W Jastrzebski, A Pashov, H Salami, and A J Ross. Coupled system  $a^3\Sigma^+$  and  $X^1\Sigma^+$  of KLi: Feshbach resonances and corrections to the Born-Oppenheimer approximation. *Physical Review A*, 79(4):042716, 2009.
